# Supplementary material for: Untargeted metabolomics reveals altered branch chain amino acids, glucose and fat metabolism contributing to coronary artery disease among Indian diabetic patients
Source: Royal Society of Chemistry journal article supplement (doi:10.1039/d2mo00320a), 2023-01-31
Supplement: d2mo00320a1.pdf [file d2mo00320a1.pdf]

**Suppl Fig.1.** Weighted Gene Co-expression Network Analysis (WGCNA). a) Scale free topology criteria. Influence of different powers on the scale independence (left) and on the mean connectivity (right). The horizontal red line indicates the selected soft threshold power  $\beta=5$  and  $R^2>0.8$  used for merging the modules. b) Cluster dendrogram of all the metabolites classified into different modules. The color bars at the bottom of the module indicate the division of modules. c) Network heatmap plot. Indicates the adjacencies of the network, each row and column in the heatmap belong to be a single metabolite. Dark brown indicates low adjacencies and progressive yellow indicates higher adjacencies among metabolites in the module.

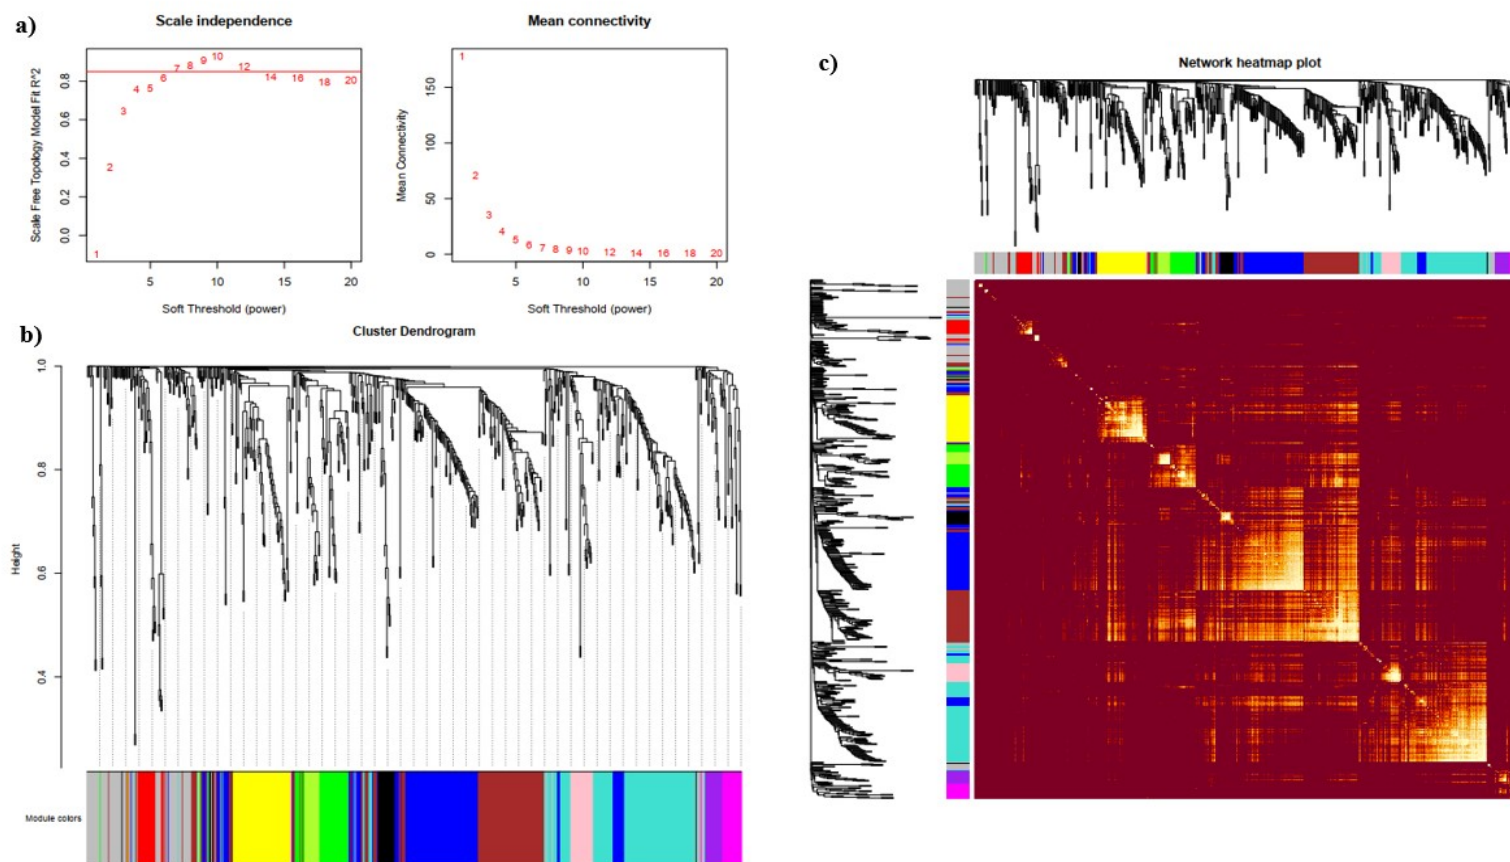

**Suppl Fig.2.** Summary of pathway analysis. Where, (a) Linoleic acid metabolism, (b) Phenylalanine, tyrosine and tryptophan biosynthesis, (c) Arginine biosynthesis (d) Glycine, serine and threonine metabolism (e) Arginine and proline metabolism, (f) Aminoacyl-tRNA biosynthesis.

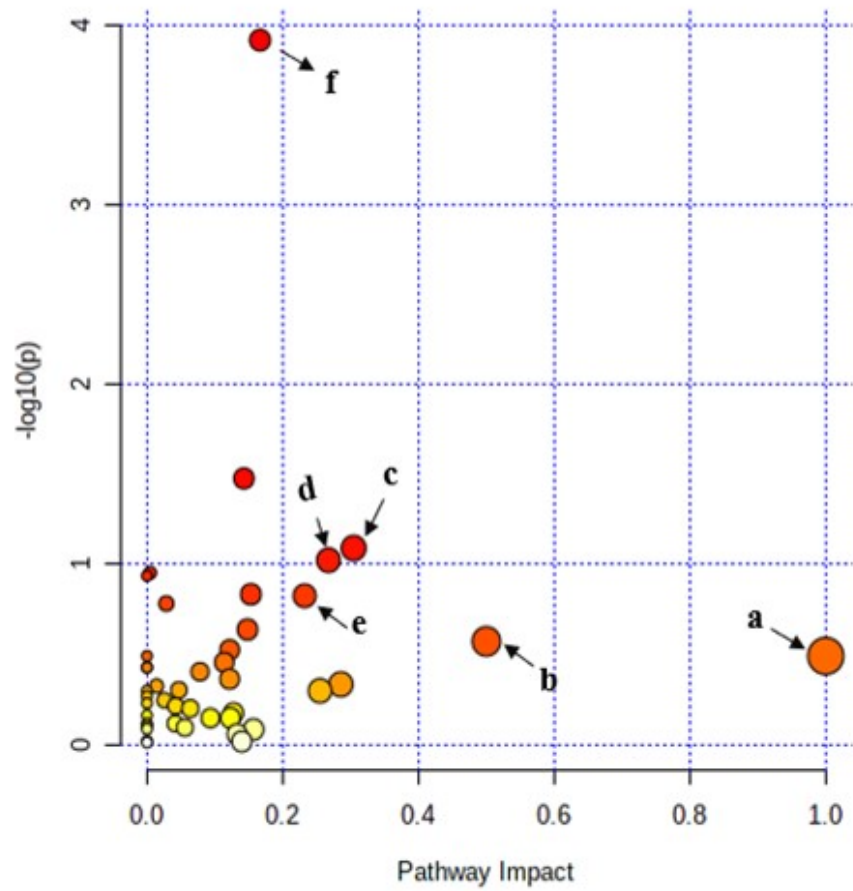



**Suppl. Table S1:** Clinical and biochemical characteristics of study groups

| <b>Variables</b>          | <b>Control (CT)<br/>(n=22)</b> | <b>T2DM<br/>(n= 21)</b> | <b>CAD<br/>(n=21)</b> | <b>T2DM_CAD<br/>(n=39)</b> |
|---------------------------|--------------------------------|-------------------------|-----------------------|----------------------------|
| Age in years              | 45.2±9.6                       | 44.9±9.3                | 47.7±7.8              | 51.9±7.8                   |
| Sex (Male/Female)         | 15/6                           | 9/11                    | 21/3                  | 34/5                       |
| BMI                       | 25.03±8.7                      | 26.3± 5.3               | 23.7±3.4              | 25.2±3.9                   |
| FBS (mg/dl)               | 92.0(89.0±108.0)               | 192.0(140.8±269.8)*     | 98.0(77.0-112.0)      | 192.0(148.0±237.0)*        |
| HbA1c (%)                 | 5.5(5.05-6.1)                  | 7.4(6.8-9.5)*           | 5.5(5.2-6.0)          | 8.4(7.0-9.4)*              |
| SBP (mm/Hg)               | 130.6±11.7                     | 128.2±13.4              | 134.9±15.5            | 131.8±21.7                 |
| DBP (mm/Hg)               | 80.1±10.8                      | 79.1±9.5                | 81.2±10.6             | 85.1±10.0                  |
| LDL-C (mg/dl)             | 87.4 (73.0-115.8)              | 74.0(60.0-98.1)         | 69.8 (55.2-82.0)      | 66.8(55.6-78.4)            |
| HDL-C (mg/dl)             | 33.9±6.8                       | 36.6±6.4                | 31.9±8.9              | 27.9±8.2                   |
| Total cholesterol (mg/dl) | 157.9±22.7                     | 152.6±28.6              | 141.9±37.4            | 152.9±26.8                 |
| Triglycerides (mg/dl)     | 149.0(89.7-236.0)              | 160.5(104.8-220.3)      | 141.0(101.0-205.0)    | 146.0 (110.0-242.0)        |
| Creatinine (mg/dl)        | 0.8±0.19                       | 0.8±0.2                 | 1.0±0.6               | 1.0±0.4                    |

Data are mean (SD) and median (Q1–Q3) for normally distributed and non-normally distributed variables respectively. \*P<0.05.

**Suppl. Table S2:** Summary of module assignment

| <b>Module colour</b> | <b>Total metabolites assigned</b> |
|----------------------|-----------------------------------|
| Black                | 24                                |
| Blue                 | 126                               |
| Brown                | 111                               |
| Green                | 42                                |
| Greenyellow          | 17                                |
| Grey                 | 91                                |
| Magenta              | 22                                |
| Pink                 | 24                                |
| Purple               | 18                                |
| Red                  | 24                                |
| Turquosie            | 132                               |
| Yellow               | 63                                |

**Suppl.Table S3:** Summary of pathway analysis

| S.No | Pathway Name                                        | Match Status | p        | -log(p) | Holm p    | FDR       | Impact  | Metabolites                                                                                                                                                   |
|------|-----------------------------------------------------|--------------|----------|---------|-----------|-----------|---------|---------------------------------------------------------------------------------------------------------------------------------------------------------------|
| 1    | Linoleic acid metabolism                            | 1/5          | 0.32021  | 0.49457 | 1.0       | 1.0       | 1.0     | Linoleic acid                                                                                                                                                 |
| 2    | Phenylalanine, tyrosine and tryptophan biosynthesis | 1/4          | 0.26558  | 0.57581 | 1.0       | 1.0       | 0.5     | L-Tyrosine                                                                                                                                                    |
| 3    | Arginine biosynthesis                               | 3/14         | 0.079379 | 1.1003  | 1.0       | 1.0       | 0.30457 | L-Citrulline, L-Arginine, L-Glutamine                                                                                                                         |
| 4    | Glycine, serine and threonine metabolism            | 5/33         | 0.091952 | 1.0364  | 1.0       | 1.0       | 0.26741 | Guanidinoacetate, Creatinine, L- Serine, Glycerol L-Threonine                                                                                                 |
| 5    | Arginine and proline metabolism                     | 4/38         | 0.14944  | 0.82555 | 1.0       | 1.0       | 0.23223 | L-Arginine, Guanidinoacetate, Creatine, L- Proline                                                                                                            |
| 6    | Aminoacyl-tRNA biosynthesis                         | 13/48        | 2.4399   | 4.6126  | 0.0020495 | 0.0020495 | 0.16667 | L-Asparagine, L-Arginine, L-Glutamine, L-Serine, L-Methionine, L-Valine, L-Alanine, L-Lysine, L-Isoleucine, L-Threonine, L-Tryptophan, L-Tyrosine, L-Cysteine |
| 7    | Starch and sucrose metabolism                       | 3/18         | 0.14659  | 0.83391 | 1.0       | 1.0       | 0.15312 | Trehalose, D-Glucose 1-phosphate, D-Fructose 6-phosphate                                                                                                      |
| 8    | Phenylalanine metabolism                            | 3/10         | 0.033238 | 1.4784  | 1.0       | 0.93066   | 0.14286 | Phenylacetaldehyde, L-Tyrosine, Hippurate                                                                                                                     |
